# Supplementary material for: Influenza Vaccination in Psoriatic Patients—Epidemiology and Patient Perceptions: A German Multicenter Study (Vac-Pso)
Source: MDPI journal article supplement (doi:10.3390/vaccines9080843), 2021-08-01
Supplement: s1 [file s1]

# Supplementary Material

File S1. Patient questionnaire (German version)

Zentrum: \_\_\_\_\_

Patienten-ID: \_\_\_\_\_

UNIVERSITÄTSMEDIZIN   
GÖTTINGEN  
Klinik für Dermatologie, Venerologie  
und Allergologie

## Patientenfragebogen

Für die Studie:

### Pneumokokkenimpfung bei Patienten mit Psoriasis oder atopischer Dermatitis

**1. Welches ist Ihr Geschlecht?**

- männlich
- weiblich

**2. Bitte nennen Sie Ihren Geburtsmonat (z.B. 01 für Januar) und Ihr Geburtsjahr (z.B. 1950).**

Geburtsmonat: \_\_\_\_\_

Geburtsjahr: \_\_\_\_\_

**3. Wie alt waren Sie bei Beginn der ersten Symptome Ihrer Hauterkrankung?**  
\_\_\_\_\_ Jahre

**4. Ist in Ihrer Familie eine Person von Psoriasis („Schuppenflechte“) betroffen?**

- Nein
- Ja

**5. Ist in Ihrer Familie eine Person von atopischer Dermatitis („Neurodermitis“) betroffen?**

- Nein
- Ja

**6. Wurde bei Ihnen eine Gelenkbeteiligung bei Psoriasis (psoriatisches Gelenkrheuma, „Psoriasisarthritis“) durch einen Arzt festgestellt?**

- Nein
- Ja, die Diagnose wurde im Alter von \_\_\_\_\_ Jahren festgestellt

**7. Wie ist Ihr derzeitiger Familienstand?**

- Feste Partnerschaft / verheiratet
- Derzeit in keiner festen Beziehung (inkl. geschieden und dauerhaft getrennt lebend)
- Verwitwet

Zentrum: \_\_\_\_\_

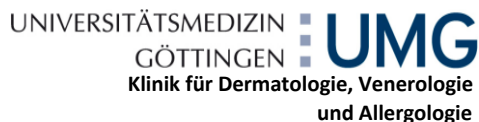

Patienten-ID: \_\_\_\_\_

**8. Welchen höchsten allgemeinbildenden Schulabschluss haben Sie?**

- Keinen Schulabschluss
- Hauptschulabschluss
- Realschulabschluss (Mittlere Reife)
- Fachhochschulreife
- Abitur/Allgemeine oder fachgebundene Hochschulreife
- Anderer Schulabschluss. Wenn ja, welchen: \_\_\_\_\_

**9. Welchen beruflichen Ausbildungsabschluss haben Sie?**

- Noch in beruflicher Ausbildung (Auszubildende/r, Student/in)
- Abgeschlossene Lehre oder Ausbildung
- Meister-, Techniker-, oder gleichwertigen Fachschulabschluss
- Hochschulabschluss
- Fachhochschulabschluss (auch Abschluss einer Ingenieurschule)
- keine abgeschlossene Berufsausbildung
- Anderen beruflichen Abschluss. Wenn ja, welchen: \_\_\_\_\_

**10. Welcher der folgenden Kategorien würden Sie sich am ehesten zuordnen?**

- Vollzeit erwerbstätig
- Teilzeit erwerbstätig
- Nicht erwerbstätig
- Student / Auszubildender
- Rentner
- Arbeitsunfähig
- Selbständig

**11. Wie sind Sie krankenversichert?**

- Gesetzlich
- Privat
- Gesetzlich mit privater Zusatzversicherung

**12. Welche anderen Erkrankungen sind bei Ihnen bekannt (Mehrfachnennungen möglich)?**

| Ja                    | Erkrankung                                                                                                                  |
|-----------------------|-----------------------------------------------------------------------------------------------------------------------------|
| <input type="radio"/> | Allergisches Kontaktekzem                                                                                                   |
| <input type="radio"/> | Allergische Rhinokonjunktivitis („Heuschnupfen“)                                                                            |
| <input type="radio"/> | Lebensmittelallergien                                                                                                       |
| <input type="radio"/> | Erhöhter Blutdruck                                                                                                          |
| <input type="radio"/> | Herz-Kreislaufkrankungen (Herzinfarkt, Schlaganfall, koronare Herzerkrankung, arterielle Verschlusskrankheit, Herzschwäche) |
| <input type="radio"/> | Erhöhte Cholesterinwerte / Blutfettwerte                                                                                    |
| <input type="radio"/> | Depressionen                                                                                                                |
| <input type="radio"/> | Asthma                                                                                                                      |
| <input type="radio"/> | Chronische Bronchitis (COPD) oder Lungenemphysem                                                                            |
| <input type="radio"/> | Fettleber                                                                                                                   |
| <input type="radio"/> | Leberzirrhose                                                                                                               |

Zentrum: \_\_\_\_\_

Patienten-ID: \_\_\_\_\_

| Ja                    | Erkrankung                             |
|-----------------------|----------------------------------------|
| <input type="radio"/> | andere Lebererkrankung                 |
|                       | wenn ja, welche: _____                 |
| <input type="radio"/> | Diabetes mellitus                      |
| <input type="radio"/> | Falls ja, müssen Sie Insulin spritzen? |
| <input type="radio"/> | Chronisches Nierenversagen             |
| <input type="radio"/> | Windpocken                             |
| <input type="radio"/> | Krebs                                  |
|                       | wenn ja, welcher: _____                |

**13. Wie groß sind Sie?**

\_\_\_\_\_cm

**14. Welches Gewicht haben Sie?**

\_\_\_\_\_kg

**15. Hatten Sie jemals eine Lungenentzündung („Pneumonie“), die mit Antibiotika behandelt werden musste** (hierzu zählen keine leichten grippalen Infekte)?

- Ich weiß nicht
  - Nein
  - Ja, vor etwa \_\_\_\_\_ Jahren
- Falls ja, wurden Sie deswegen stationär in einem Krankenhaus behandelt?
- Nein, nur ambulant.
  - Ja, stationär.

**16. Hatten Sie jemals eine schwere Entzündung der Atemwege („schwere Bronchitis“), die mit Antibiotika behandelt werden musste** (hierzu zählen keine leichten grippalen Infekte)?

- Ich weiß nicht
  - Nein
  - Ja, vor etwa \_\_\_\_\_ Jahren
- Falls ja, wurden Sie deswegen stationär in einem Krankenhaus behandelt?
- Nein, nur ambulant.
  - Ja, stationär.

**17. Hatten Sie jemals eine Gürtelrose („Herpes Zoster“)?**

- Ich weiß nicht
  - Nein
  - Ja, vor etwa \_\_\_\_\_ Jahren
- Falls ja, war die Gürtelrose bei Ihnen mit Schmerzen verbunden („Zosterneuralgie“)?
- Nein
  - Ja

**18. Wissen Sie, ob Sie einen positiven Bluttitel bzgl. Varizellen (Windpocken) haben** (Dieser wird z.B. im Rahmen einer Schwangerschaft bestimmt)?

- Ja, ich habe einen positiven Titer.
- Ja, ich habe einen negativen Titer.
- Ich weiß nicht.

Zentrum: \_\_\_\_\_

Patienten-ID: \_\_\_\_\_

**19. Rauchen Sie zurzeit?**

- Ja, 1 - 10 Zigaretten pro Tag
- Ja, 11 - 20 Zigaretten pro Tag
- Ja, über 20 Zigaretten pro Tag
- Ja, E-Zigaretten
- Nein, aber ich habe früher geraucht
- Nein, ich habe noch nie geraucht

**20. Sind Sie gegen Influenza geimpft (dies entspricht der „Gripeschutzimpfung“)?**

- Ja, und Impfungen wurden in den Impfausweis eingetragen → Bitte folgen Sie dem Pfeil links.
- Ja, aber Impfungen wurden nicht in den Impfausweis eingetragen → Bitte folgen Sie dem Pfeil links.
- Nein → Bitte überspringen Sie die folgenden Fragen und machen mit Frage 27 (blau markiert) weiter (dem Pfeil rechts folgen).
- Weiß ich nicht → Bitte überspringen Sie die folgenden Fragen und machen mit Frage 27 (blau markiert) weiter (dem Pfeil rechts folgen).

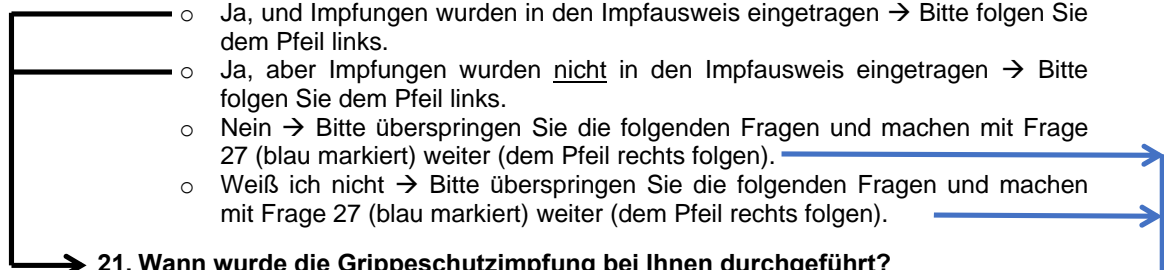

**21. Wann wurde die Gripeschutzimpfung bei Ihnen durchgeführt?**

- Zuletzt vor \_\_\_\_\_ Jahren
- Weiß ich nicht

**22. Wer hat Ihnen die Gripeschutzimpfung empfohlen? (Mehrfachnennungen möglich)**

| Ja                    | Nein                  |                                            |
|-----------------------|-----------------------|--------------------------------------------|
| <input type="radio"/> | <input type="radio"/> | Mein Hausarzt / Internist                  |
| <input type="radio"/> | <input type="radio"/> | Mein Dermatologe                           |
| <input type="radio"/> | <input type="radio"/> | Mein Rheumatologe                          |
| <input type="radio"/> | <input type="radio"/> | Ein anderer Arzt                           |
| <input type="radio"/> | <input type="radio"/> | Kein Arzt, ich habe mich selbst informiert |
| <input type="radio"/> | <input type="radio"/> | Bekannte                                   |

**23. Wer hat die Gripeschutzimpfung bei Ihnen durchgeführt?**

- Mein Hausarzt / Internist
- Mein Dermatologe
- Mein Rheumatologe
- Ein anderer Arzt

**24. Aus welchem Grund haben Sie sich für die Gripeschutzimpfung entschieden (Mehrfachantworten möglich)?**

| Ja                    | Nein                  |                                                                       |
|-----------------------|-----------------------|-----------------------------------------------------------------------|
| <input type="radio"/> | <input type="radio"/> | Aufgrund der allgemeinen Empfehlung zu dieser Impfung                 |
| <input type="radio"/> | <input type="radio"/> | Aufgrund der allgemeinen Empfehlung meines Arztes                     |
| <input type="radio"/> | <input type="radio"/> | Aufgrund meiner Hauterkrankung                                        |
| <input type="radio"/> | <input type="radio"/> | Aufgrund der Behandlung meiner Hauterkrankung                         |
| <input type="radio"/> | <input type="radio"/> | Aufgrund anderer bei mir bekannter Erkrankungen oder deren Behandlung |
| <input type="radio"/> | <input type="radio"/> | Anderer Grund: _____                                                  |

Zentrum: \_\_\_\_\_

Patienten-ID: \_\_\_\_\_

**25. Wie haben Sie die Gripeschutzimpfung vertragen?**

- Die Impfung habe ich ohne Probleme vertragen
- Nach der Impfung traten Reaktionen an der Einstichstelle auf (z.B. Rötung, Verhärtung, Schwellung)
- Nach der Impfung traten Fieber, Abgeschlagenheit, Müdigkeit, Muskelschmerzen oder Kopfschmerzen auf
- Nach der Impfung kam es zu einer schweren Störung des Gesundheitszustandes, nämlich: \_\_\_\_\_

**26. Für den Fall, dass bei Ihnen im Winterhalbjahr 2018/2019 KEINE Gripeschutzimpfung durchgeführt wurde. Was war der Grund hierfür (Mehrfachnennungen möglich)?**

- Trifft nicht zu. Bei mir wurde im Winterhalbjahr 2018/2019 eine Gripeschutzimpfung durchgeführt.

**ODER:**

| Trifft zu             | Trifft nicht zu       |                                                                                          |
|-----------------------|-----------------------|------------------------------------------------------------------------------------------|
| <input type="radio"/> | <input type="radio"/> | Mir wurde diese Impfung bisher nicht von einem Arzt empfohlen                            |
| <input type="radio"/> | <input type="radio"/> | Mir wurde von einem Arzt von der Impfung abgeraten                                       |
| <input type="radio"/> | <input type="radio"/> | Ich halte diese Impfung für nicht notwendig.                                             |
| <input type="radio"/> | <input type="radio"/> | Ich habe diese Impfung vergessen.                                                        |
| <input type="radio"/> | <input type="radio"/> | Ich hatte keine Zeit.                                                                    |
| <input type="radio"/> | <input type="radio"/> | Ich hätte die Impfung selbst bezahlen müssen                                             |
| <input type="radio"/> | <input type="radio"/> | Weil ich nicht glaube, dass mich die Impfung ausreichend vor der Infektion schützt       |
| <input type="radio"/> | <input type="radio"/> | Aus Angst vor möglichen Nebenwirkungen                                                   |
| <input type="radio"/> | <input type="radio"/> | Aufgrund meines Hautzustandes war keine Impfung möglich                                  |
| <input type="radio"/> | <input type="radio"/> | Aufgrund von Medikamenten, die ich zur Behandlung der Hauterkrankung regelmäßig einnehme |
| <input type="radio"/> | <input type="radio"/> | Aufgrund von anderen Medikamenten, die ich regelmäßig einnehme                           |
| <input type="radio"/> | <input type="radio"/> | Aufgrund von anderen Erkrankungen                                                        |
| <input type="radio"/> | <input type="radio"/> | Ich hatte bisher keine schwere Grippe                                                    |
| <input type="radio"/> | <input type="radio"/> | Anderer Grund: _____                                                                     |

**27. Bei Ihnen wurde KEINE Gripeschutzimpfung durchgeführt. Bitte nennen Sie den Grund hierfür (Mehrfachnennungen möglich)! ←**

| Trifft zu             | Trifft nicht zu       |                                                               |
|-----------------------|-----------------------|---------------------------------------------------------------|
| <input type="radio"/> | <input type="radio"/> | Mir wurde diese Impfung bisher nicht von einem Arzt empfohlen |
| <input type="radio"/> | <input type="radio"/> | Mir wurde von einem Arzt von der Impfung abgeraten            |
| <input type="radio"/> | <input type="radio"/> | Ich halte diese Impfung für nicht notwendig.                  |
| <input type="radio"/> | <input type="radio"/> | Ich habe diese Impfung vergessen.                             |
| <input type="radio"/> | <input type="radio"/> | Ich hatte keine Zeit.                                         |

Zentrum: \_\_\_\_\_

Patienten-ID: \_\_\_\_\_

| Trifft zu             | Trifft nicht zu       |                                                                                          |
|-----------------------|-----------------------|------------------------------------------------------------------------------------------|
| <input type="radio"/> | <input type="radio"/> | Ich hätte die Impfung selbst bezahlen müssen                                             |
| <input type="radio"/> | <input type="radio"/> | Weil ich nicht glaube, dass mich die Impfung ausreichend vor der Infektion schützt       |
| <input type="radio"/> | <input type="radio"/> | Aus Angst vor möglichen Nebenwirkungen                                                   |
| <input type="radio"/> | <input type="radio"/> | Aufgrund meines Hautzustandes war keine Impfung möglich                                  |
| <input type="radio"/> | <input type="radio"/> | Aufgrund von Medikamenten, die ich zur Behandlung der Hauterkrankung regelmäßig einnehme |
| <input type="radio"/> | <input type="radio"/> | Aufgrund von anderen Medikamenten, die ich regelmäßig einnehme                           |
| <input type="radio"/> | <input type="radio"/> | Aufgrund von anderen Erkrankungen                                                        |
| <input type="radio"/> | <input type="radio"/> | Ich hatte bisher keine schwere Grippe                                                    |
| <input type="radio"/> | <input type="radio"/> | Anderer Grund: _____                                                                     |

**28. Sind Sie gegen Pneumokokken geimpft? (Pneumokokken sind bakterielle Erreger einer Lungenentzündung, dies entspricht NICHT der jährlichen „Gripeschutzimpfung“)**

- Ja → Bitte folgen Sie dem Pfeil links.
- Nein → Bitte überspringen Sie die folgenden Fragen und machen mit der letzten Frage weiter (rot markierte Frage 34, dem Pfeil rechts folgen)
- Weiß ich nicht → Bitte überspringen Sie die folgenden Fragen und machen mit der letzten Frage weiter (rot markierte Frage 34, dem Pfeil rechts folgen)

**29. Wann wurde die Pneumokokkenimpfung bei Ihnen durchgeführt?**

Zuletzt vor \_\_\_\_\_ Jahren

- Weiß ich nicht

**30. Wer hat Ihnen die Pneumokokkenimpfung empfohlen? (Mehrfachnennungen möglich)**

| Ja                    | Nein                  |                                            |
|-----------------------|-----------------------|--------------------------------------------|
| <input type="radio"/> | <input type="radio"/> | Mein Hausarzt / Internist                  |
| <input type="radio"/> | <input type="radio"/> | Mein Dermatologe                           |
| <input type="radio"/> | <input type="radio"/> | Mein Rheumatologe                          |
| <input type="radio"/> | <input type="radio"/> | Ein anderer Arzt                           |
| <input type="radio"/> | <input type="radio"/> | Kein Arzt, ich habe mich selbst informiert |
| <input type="radio"/> | <input type="radio"/> | Bekannte                                   |

**31. Wer hat die Pneumokokkenimpfung bei Ihnen durchgeführt?**

- Mein Hausarzt / Internist
- Mein Dermatologe
- Mein Rheumatologe
- Ein anderer Arzt

Zentrum: \_\_\_\_\_

Patienten-ID: \_\_\_\_\_

**32. Aus welchem Grund haben Sie sich für die Pneumokokkenimpfung entschieden (Mehrfachantworten möglich)?**

| Ja                    | Nein                  |                                                                       |
|-----------------------|-----------------------|-----------------------------------------------------------------------|
| <input type="radio"/> | <input type="radio"/> | Aufgrund der allgemeinen Empfehlung zu dieser Impfung                 |
| <input type="radio"/> | <input type="radio"/> | Aufgrund der allgemeinen Empfehlung meines Arztes                     |
| <input type="radio"/> | <input type="radio"/> | Aufgrund meiner Hauterkrankung                                        |
| <input type="radio"/> | <input type="radio"/> | Aufgrund der Behandlung meiner Hauterkrankung                         |
| <input type="radio"/> | <input type="radio"/> | Aufgrund anderer bei mir bekannter Erkrankungen oder deren Behandlung |
| <input type="radio"/> | <input type="radio"/> | Anderer Grund: _____                                                  |

**33. Wie haben Sie die Pneumokokkenimpfung vertragen?**

- Die Impfung habe ich ohne Probleme vertragen
- Nach der Impfung traten Reaktionen an der Einstichstelle auf (z.B. Rötung, Verhärtung, Schwellung)
- Nach der Impfung traten Fieber, Abgeschlagenheit, Müdigkeit, Muskelschmerzen oder Kopfschmerzen auf
- Nach der Impfung kam es zu einer schweren Störung des Gesundheitszustandes, nämlich: \_\_\_\_\_

**34. Bei Ihnen wurde KEINE Pneumokokkenimpfung durchgeführt. Bitte nennen Sie den Grund hierfür (Mehrfachnennungen möglich)!**

| Trifft zu             | Trifft nicht zu       |                                                                                          |
|-----------------------|-----------------------|------------------------------------------------------------------------------------------|
| <input type="radio"/> | <input type="radio"/> | Mir wurde diese Impfung bisher nicht von einem Arzt empfohlen                            |
| <input type="radio"/> | <input type="radio"/> | Mir wurde von einem Arzt von der Impfung abgeraten                                       |
| <input type="radio"/> | <input type="radio"/> | Ich halte diese Impfung für nicht notwendig.                                             |
| <input type="radio"/> | <input type="radio"/> | Ich habe diese Impfung vergessen.                                                        |
| <input type="radio"/> | <input type="radio"/> | Ich hatte keine Zeit.                                                                    |
| <input type="radio"/> | <input type="radio"/> | Ich hätte die Impfung selbst bezahlen müssen                                             |
| <input type="radio"/> | <input type="radio"/> | Weil ich nicht glaube, dass mich die Impfung ausreichend vor der Infektion schützt       |
| <input type="radio"/> | <input type="radio"/> | Aus Angst vor möglichen Nebenwirkungen                                                   |
| <input type="radio"/> | <input type="radio"/> | Aufgrund meines Hautzustandes war keine Impfung möglich                                  |
| <input type="radio"/> | <input type="radio"/> | Aufgrund von Medikamenten, die ich zur Behandlung der Hauterkrankung regelmäßig einnehme |
| <input type="radio"/> | <input type="radio"/> | Aufgrund von anderen Medikamenten, die ich regelmäßig einnehme                           |
| <input type="radio"/> | <input type="radio"/> | Aufgrund von anderen Erkrankungen                                                        |
| <input type="radio"/> | <input type="radio"/> | Ich hatte bisher keine schwere Grippe                                                    |
| <input type="radio"/> | <input type="radio"/> | Anderer Grund: _____                                                                     |

**Vielen Dank für Ihre Teilnahme an der Studie.**

Vom Arzt auszufüllen: DLQI: \_\_\_\_\_

PASI: \_\_\_\_\_

**Table S2.** Subgroup analysis with respect to influenza vaccination status. <sup>a</sup> If not indicated otherwise, the number and percentage are depicted. <sup>b</sup> Differences comparing the subgroups of vaccinated and not vaccinated patients separately for PsO and AD were calculated with Pearson's  $\chi^2$ -test for discrete-valued variables and student's t-test and Mann-Whitney u test for normally and not-normally distributed continuous variables, respectively. Significant results are printed in bold. <sup>c</sup> Cardiovascular diseases comprised heart attack, stroke, coronary artery disease, arterial occlusive disease, cardiac insufficiency. <sup>d</sup> Other hepatic diseases comprised focal nodular hyperplasia (n=1), Gilbert's syndrome (n=1), hemangioma (n=2), primary biliary cholangitis (n=1), hepatitis B (n=7), hepatitis C (n=2), and healed hepatitis E (n=2). <sup>e</sup> Chronic kidney disease was assumed if indicated in the questionnaire and, if not indicated in the questionnaire, according to serum creatinine levels using the CKD-EPI equation 2009 [23]. <sup>f</sup> Neoplastic diseases comprised lymphoma (n=4), breast cancer (n=4), cervix carcinoma (n=2), melanoma (n=2), renal cell carcinoma (n=1), colon carcinoma (n=1) and glioblastoma (n=1). <sup>g</sup> The percentage refers to the number of patients with the respective infectious disease (pneumonia, bronchitis, and herpes zoster, respectively). <sup>h</sup> Immunosuppressive therapy consisted of cyclosporine, fumaric acid ester, leflunomide, methotrexate, tofacitinib, and biologicals. PsO: psoriasis; AD: atopic dermatitis; PsA: psoriatic arthritis; BMI: Body mass index; COPD: chronic obstructive pulmonary disease; SD: standard deviation; IQR: interquartile range.

| Characteristic                            | Psoriasis                      |                                   |                      | Atopic dermatitis              |                                   |              |
|-------------------------------------------|--------------------------------|-----------------------------------|----------------------|--------------------------------|-----------------------------------|--------------|
|                                           | Vaccinated, n (%) <sup>a</sup> | Unvaccinate d, n (%) <sup>a</sup> | p-value <sup>b</sup> | Vaccinated, n (%) <sup>a</sup> | Unvaccinate d, n (%) <sup>a</sup> | p-value      |
| Cohort size                               | 163                            | 164                               |                      | 32                             | 66                                |              |
| Female gender                             | 77 (47.2)                      | 60 (36.6)                         | 0.057                | 16 (50.0)                      | 26 (39.4)                         | 0.386        |
| Age, years, mean (SD)                     | <b>58.0 (12.5)</b>             | <b>48.8 (13.6)</b>                | <b>&lt;0.001</b>     | <b>50.0 (19.2)</b>             | <b>41.6 (17.6)</b>                | <b>0.040</b> |
| Age at onset of disease, years, mean (SD) | <b>33.4 (17.7)</b>             | <b>24.3 (14.5)</b>                | <b>0.006</b>         | 21.9 (29.5)                    | 15.4 (22.5)                       | 0.271        |
| Disease duration years, mean (SD)         | 24.6 (16.1)                    | 24.4 (14.9)                       | 0.922                | 28.1 (21.3)                    | 26.2 (16.4)                       | 0.664        |
| Family history of PsO                     | 75 (46.0)                      | 88 (53.7)                         | 0.185                | 6 (18.8)                       | 15 (22.7)                         | 0.795        |
| Family history of AD                      | 27 (16.6)                      | 23 (14.0)                         | 0.543                | 13 (40.6)                      | 33 (50.0)                         | 0.399        |
| Occupational status                       |                                |                                   |                      |                                |                                   |              |
| Working full-time                         | <b>54 (33.1)</b>               | <b>84 (51.2)</b>                  | <b>0.001</b>         | 10 (31.3)                      | 26 (39.4)                         | 0.507        |
| Working part-time                         | 15 (9.2)                       | 23 (14.0)                         | 0.227                | 7 (21.9)                       | 11 (16.7)                         | 0.583        |
| Currently unemployed                      | 7 (4.3)                        | 4 (2.4)                           | 0.379                | 2 (6.3)                        | 1 (1.5)                           | 0.248        |
| Student                                   | <b>2 (1.2)</b>                 | <b>12 (7.3)</b>                   | <b>0.011</b>         | 4 (12.5)                       | 11 (16.7)                         | 0.768        |
| Retired                                   | <b>73 (44.8)</b>               | <b>30 (18.3)</b>                  | <b>0.002</b>         | 7 (21.9)                       | 11 (16.7)                         | 0.583        |
| Unable to work                            | 6 (3.7)                        | 4 (2.4)                           | 0.542                | 1 (3.1)                        | 3 (4.5)                           | 1.000        |
| Self employed                             | 6 (3.7)                        | 7 (4.3)                           | 1.000                | 1 (3.1)                        | 3 (4.5)                           | 1.000        |
| Partnership status                        |                                |                                   |                      |                                |                                   |              |
| In a permanent relationship               | 123 (75.5)                     | 122 (74.4)                        | 0.899                | <b>24 (75.0)</b>               | <b>16 (24.2)</b>                  | <b>0.006</b> |
| no partner                                | 28 (17.2)                      | 37 (22.6)                         | 0.268                | <b>6 (18.8)</b>                | <b>49 (74.2)</b>                  | <b>0.002</b> |
| widowed                                   | 12 (7.4)                       | 5 (3.0)                           | 0.087                | 2 (6.3)                        | 1 (1.5)                           | 0.248        |
| Comorbidity                               |                                |                                   |                      |                                |                                   |              |
| PsA                                       | <b>104 (63.8)</b>              | <b>83 (50.6)</b>                  | <b>0.019</b>         | -                              | -                                 | -            |
| Age at onset of PsA, years, mean (SD)     | <b>49.3 (13.8)</b>             | <b>42.2 (12.4)</b>                | <b>&lt;0.001</b>     | -                              | -                                 | -            |



|                                                |                  |                  |                  |            |            |       |
|------------------------------------------------|------------------|------------------|------------------|------------|------------|-------|
| BMI (mean, SD)                                 | 30.2 (6.6)       | 29.7 (6.6)       | 0.504            | 27.9 (7.6) | 25.1 (3.9) | 0.056 |
| Obesity (BMI $\geq$ 30)                        | <b>82 (50.3)</b> | <b>60 (36.6)</b> | <b>0.014</b>     | 6 (18.8)   | 9 (13.6)   | 0.556 |
| Arterial hypertension                          | <b>90 (55.2)</b> | <b>56 (34.1)</b> | <b>&lt;0.001</b> | 12 (37.5)  | 18 (27.3)  | 0.361 |
| Cardiovascular disease <sup>c</sup>            | 32 (19.6)        | 24 (14.6)        | 0.244            | 5 (15.6)   | 7 (10.6)   | 0.520 |
| Dyslipidemia                                   | <b>51 (31.3)</b> | <b>35 (21.3)</b> | <b>0.045</b>     | 3 (9.4)    | 8 (12.1)   | 0.752 |
| Hepatic steatosis                              | 56 (34.4)        | 50 (30.5)        | 0.292            | 4 (12.5)   | 3 (4.5)    | 0.211 |
| Hepatic cirrhosis                              | 4 (2.5)          | 3 (1.8)          | 0.723            | 0 (0.0)    | 0 (0.0)    | 1.000 |
| Other hepatic diseases <sup>d</sup>            | 5 (3.1)          | 9 (5.5)          | 0.414            | 1 (3.1)    | 1 (1.5)    | 0.549 |
| Diabetes mellitus                              | <b>27 (16.6)</b> | <b>13 (7.9)</b>  | <b>0.019</b>     | 2 (6.3)    | 2 (3.0)    | 0.595 |
| Chronic kidney disease <sup>e</sup>            | 13 (8.0)         | 7 (4.3)          | 0.165            | 2 (6.3)    | 2 (3.0)    | 0.600 |
| COPD / emphysema                               | <b>23 (14.1)</b> | <b>8 (4.9)</b>   | <b>0.005</b>     | 2 (6.3)    | 5 (7.6)    | 1.000 |
| Asthma                                         | 17 (10.4)        | 12 (7.3)         | 0.338            | 14 (43.8)  | 27 (40.9)  | 0.830 |
| Allergic contact dermatitis                    | 15 (9.2)         | 13 (7.9)         | 0.698            | 14 (43.8)  | 24 (36.4)  | 0.513 |
| Allergic rhinoconjunctivities                  | 24 (14.7)        | 28 (17.1)        | 0.651            | 20 (62.5)  | 41 (62.1)  | 1.000 |
| Food allergies                                 | 12 (7.4)         | 15 (9.1)         | 0.689            | 14 (43.8)  | 33 (50.0)  | 0.667 |
| Depression                                     | 42 (25.8)        | 28 (17.1)        | 0.060            | 6 (18.8)   | 10 (15.2)  | 0.772 |
| Neoplastic diseases <sup>f</sup>               | 8 (4.9)          | 3 (1.8)          | 0.070            | 0 (0.0)    | 4 (6.1)    | 1.000 |
| <b>Smoking status</b>                          |                  |                  |                  |            |            |       |
| Current smoker                                 | 49 (30.1)        | 63 (38.4)        | 0.111            | 6 (18.8)   | 25 (37.9)  | 0.056 |
| Ex-smoker                                      | <b>83 (50.9)</b> | <b>61 (37.2)</b> | <b>0.014</b>     | 12 (37.5)  | 15 (22.7)  | 0.232 |
| Never smoker                                   | 31 (19.0)        | 40 (24.4)        | 0.423            | 14 (43.8)  | 26 (39.4)  | 0.082 |
| <b>Previous infectious diseases</b>            |                  |                  |                  |            |            |       |
| Pneumonia                                      | 34 (20.9)        | 22 (13.4)        | 0.136            | 4 (12.5)   | 14 (21.2)  | 0.404 |
| Years since pneumonia, mean (SD)               | 16.8 (16.2)      | 14.0 (14.3)      | 0.509            | 14.8 (9.5) | 14.8 (8.5) | 0.997 |
| Hospitalization due to pneumonias <sup>g</sup> | 10 (29.4)        | 4 (18.2)         | 0.343            | 1 (25.0)   | 6 (42.9)   | 0.518 |
| Bronchitis                                     | <b>57 (35.0)</b> | <b>37 (22.6)</b> | <b>0.042</b>     | 13 (40.6)  | 16 (24.2)  | 0.230 |
| Years since bronchitis                         | 7.6 (10.0)       | 7.8 (9.6)        | 0.949            | 8.5 (11.6) | 3.8 (4.1)  | 0.197 |
| Hospitalization due to bronchitis <sup>h</sup> | <b>8 (14.0)</b>  | <b>0 (0.0)</b>   | <b>0.020</b>     | 1 (7.7)    | 0 (0.0)    | 0.448 |
| Herpes zoster                                  | 32 (19.6)        | 24 (14.6)        | 0.242            | 5 (15.6)   | 8 (12.1)   | 0.754 |

|                                                |                |               |       |                 |                 |       |
|------------------------------------------------|----------------|---------------|-------|-----------------|-----------------|-------|
| Years since Herpes zoster, mean (SD)           | 15.4 (14.6)    | 14.0 (11.8)   | 0.694 | 13.4 (15.4)     | 13.9 (12.4)     | 0.955 |
| (Post)herpetic neuralgia <sup>g</sup>          | 26 (81.3)      | 17 (70.8)     | 0.361 | 4 (80.0)        | 7 (87.5)        | 0.715 |
| <b>Disease activity</b>                        |                |               |       |                 |                 |       |
| PASI median (IQR)                              | 1.9 (0.0 -4.0) | 1.6 (0.6-4.3) | 0.562 | -               | -               | -     |
| EASI median (IQR)                              | -              | -             | -     | 9.6 (2.3-17.2)  | 11.4 (3.2-17.4) | 0.575 |
| DLQI median (IQR)                              | 2.0 (0.0-8.0)  | 3.0 (1.0-9.0) | 0.347 | 11.5 (5.0-18.0) | 13.0 (4.3-18.0) | 0.704 |
| Current immunosuppressive therapy <sup>h</sup> | 137 (84.0)     | 137 (83.5)    | 0.900 | 16 (50.0)       | 26 (39.4)       | 0.320 |

**Table S3.** Regression analyses predicting reasons against influenza vaccination in PsO patients. The probability of stating a distinct reason against vaccination (shown in the heading) was chosen as the dependent variable. Age, gender, occupational status, and PsA served as independent variables. Significant predictors are printed in bold. a The reference category to female was male. b The reference category of working full-time was any other occupational status. The model was adjusted for the center of recruitment (not shown). SE: standard error.

**(a) Vaccination not deemed necessary by patient.**

| Predictor                      | Coefficient (SE)     | p-value      |
|--------------------------------|----------------------|--------------|
| Age                            | 0.003 (0.003)        | 0.302        |
| Female <sup>a</sup>            | -0.026 (0.086)       | 0.759        |
| Working full-time <sup>b</sup> | -0.022 (0.085)       | 0.797        |
| PsA                            | -0.010 (0.082)       | 0.902        |
| <b>Constant</b>                | <b>0.475 (0.235)</b> | <b>0.045</b> |

**(b) No personal history of severe flu.**

| Predictor                      | Coefficient (SE) | p-value |
|--------------------------------|------------------|---------|
| Age                            | 0.001 (0.003)    | 0.635   |
| Female <sup>a</sup>            | 0.109 (0.086)    | 0.204   |
| Working full-time <sup>b</sup> | 0.113 (0.083)    | 0.176   |
| PsA                            | -0.029 (0.081)   | 0.721   |
| Constant                       | 0.358 (0.240)    | 0.137   |

**(c) Lacking recommendation by a physician.**

| Predictor                      | Coefficient (SE)      | p-value      |
|--------------------------------|-----------------------|--------------|
| <b>Age</b>                     | <b>-0.006 (0.003)</b> | <b>0.038</b> |
| Female <sup>a</sup>            | -0.118 (0.080)        | 0.141        |
| Working full-time <sup>b</sup> | 0.104 (0.083)         | 0.209        |
| PsA                            | -0.029 (0.077)        | 0.713        |
| <b>Constant</b>                | <b>0.471 (0.237)</b>  | <b>0.049</b> |

**(d) Lacking confidence in protective effect.**

| Predictor                      | Coefficient (SE) | p-value |
|--------------------------------|------------------|---------|
| Age                            | 0.002 (0.003)    | 0.452   |
| Female <sup>a</sup>            | 0.012 (0.077)    | 0.875   |
| Working full-time <sup>b</sup> | -0.038 (0.075)   | 0.615   |
| PsA                            | -0.067 (0.069)   | 0.338   |
| Constant                       | 0.202 (0.190)    | 0.290   |

**(e) Potential side effects.**

| Predictor                      | Coefficient (SE) | p-value |
|--------------------------------|------------------|---------|
| Age                            | 0.002 (0.002)    | 0.500   |
| Female <sup>a</sup>            | 0.018 (0.073)    | 0.806   |
| Working full-time <sup>b</sup> | 0.121 (0.073)    | 0.099   |
| PsA                            | -0.011 (0.070)   | 0.872   |
| Constant                       | 0.175 (0.185)    | 0.346   |

**(f) Patient forgot to get vaccinated.**

| Predictor                      | Coefficient (SE) | p-value |
|--------------------------------|------------------|---------|
| Age                            | -0.002 (0.002)   | 0.349   |
| Female <sup>a</sup>            | -0.030 (0.045)   | 0.509   |
| Working full-time <sup>b</sup> | 0.052 (0.050)    | 0.292   |
| PsA                            | 0.039 (0.049)    | 0.432   |
| Constant                       | 0.139 (0.131)    | 0.290   |

**(g) No time for vaccination.**

| Predictor                            | Coefficient (SE)     | p-value      |
|--------------------------------------|----------------------|--------------|
| Age                                  | -0.001 (0.002)       | 0.539        |
| Female <sup>a</sup>                  | 0.007 (0.048)        | 0.879        |
| <b>Working full-time<sup>b</sup></b> | <b>0.135 (0.049)</b> | <b>0.006</b> |
| PsA                                  | -0.033 (0.053)       | 0.674        |
| Constant                             | 0.167 (0.119)        | 0.161        |
